# Supplementary material for: Aroma Properties of Cocoa Fruit Pulp from Different Origins
Source: MDPI journal article supplement (doi:10.3390/molecules26247618), 2021-12-15
Supplement: s1 [file s1]

Table S1: Aroma-active compounds identified in cocoa pulps grown in Indonesia, Vietnam, Cameroon and Nicaragua by means of SBSE-GC-MS

| No. <sup>a</sup> | Odorant <sup>b</sup>                  | Molecular weight [g/mol] | Odor Quality <sup>c</sup> | retention index on |
|------------------|---------------------------------------|--------------------------|---------------------------|--------------------|
|                  |                                       |                          |                           | DB-FFAP            |
| 1                | methyl 2-methylbutanoate              | 116.16                   | fruity, banana-like       | 1017               |
| 2                | hexanal                               | 100.16                   | green                     | 1089               |
| 3                | (-)-beta-pinene <sup>d</sup>          | 136.23                   | green, eucalyptus-like    | 1101               |
| 4                | 3-methylbutyl acetate                 | 130.18                   | fruity                    | 1118               |
| 5                | δ-carene                              | 136.23                   | green                     | 1140               |
| 6                | R-(+)-limonene <sup>d</sup>           | 184.23                   | citrus-like               | 1189               |
| 7                | 3-methylbutanol                       | 88.15                    | malty, roasty             | 1200               |
| 8                | 2-heptanone                           | 114.19                   | fruity, flowery           | 1207               |
| 9                | pentan-1-ol <sup>d</sup>              | 88.15                    | fruity                    | 1241               |
| 10               | octanal                               | 128.21                   | citrus-like, green        | 1280               |
| 11               | (E)-2-heptenal                        | 112.17                   | green, flowery            | 1311               |
| 12               | 1-hexanol                             | 102.17                   | green, grassy             | 1338               |
| 13               | nonanal                               | 142.24                   | citrus-like, soapy        | 1376               |
| 14               | (E)-2-octenal                         | 126.2                    | fatty, grassy, green      | 1417               |
| 15               | acetic acid                           | 60.05                    | vinegar-like              | 1430               |
| 16               | (E,E)-2,4-heptadienal                 | 110.15                   | fatty, roasty             | 1486               |
| 17               | (Z)-2-nonenal                         | 140.22                   | green, fatty              | 1494               |
| 18               | benzaldehyde <sup>d</sup>             | 106.12                   | almond-like               | 1515               |
| 19               | (E)-2-nonenal                         | 140.22                   | fatty, cardboard-like     | 1524               |
| 20               | linalool                              | 154.25                   | flowery                   | 1539               |
| 21               | 1-octanol <sup>d</sup>                | 130.23                   | soapy, green              | 1545               |
| 22               | (E,Z)-2,6-nonadienal                  | 138.21                   | cucumber-like, fatty      | 1574               |
| 23               | (E)-2-decenal                         | 154.25                   | green, fatty              | 1616               |
| 24 a/b           | 2- and 3-methylbutanoic acid          | 102.13                   | rancid, cheesy            | 1662               |
| 25               | (E,E)-2,4-nonadienal                  | 138.21                   | fatty, deep fried         | 1696               |
| 26               | pentanoic acid <sup>d</sup>           | 102.13                   | fruity                    | 1702               |
| 27               | (E,E)-2,4-decadienal                  | 152.23                   | fatty                     | 1800               |
| 28               | 2-methoxyphenol                       | 124.14                   | smoky, ham-like           | 1848               |
| 29               | 2-phenylethanol                       | 122.16                   | rose-like, flowery        | 1897               |
| 30               | 4-hydroxy-2,5-dimethyl-3(2H)-furanone | 128.13                   | caramel-like              | 2026               |
| 31               | 2,3-dimethylphenol                    | 122.16                   | phenolic                  | 2109               |
| 32               | 4-vinyl-2-methoxyphenol               | 150.17                   | smoky, clove-like         | 2128               |
| 33               | 3-hydroxy-4,5-dimethylfuran-2(5H)-one | 128.13                   | maggi-like, celery-like   | 2194               |
| 34               | undecanoic acid                       | 186.29                   | soapy, coriander-like     | 2323               |
| 35               | 4-methoxyphenol                       | 124.14                   | phenolic                  | 2388               |
| 36               | dodecanoic acid                       | 200.32                   | fatty, wax-like           | 2496               |
| 37               | phenylacetic acid                     | 136.15                   | honey-like                | 2545               |

<sup>a</sup> Consecutive numbering of odorants according to their retention indices on capillary column DB-FFAP. <sup>b</sup> Odorant was identified by comparison of its odor quality and intensity, retention indices on capillary DB-FFAP as well as mass spectra (EI mode) with data of reference compounds. <sup>c</sup> Odor quality perceived at the odor detection port. <sup>d</sup> Odorant not determined in the cocoa pulp extracts with a factor of FD>2

Table S2: Aroma-active compounds identified in cocoa pulps grown in Indonesia, Vietnam, Cameroon and Nicaragua by means of HS-SPME-GC-MS

|                  |                                       |                          |                            |  | retention index on |
|------------------|---------------------------------------|--------------------------|----------------------------|--|--------------------|
| No. <sup>a</sup> | Odorant <sup>b</sup>                  | Molecular weight [g/mol] | Odor Quality <sup>c</sup>  |  | DB-FFAP            |
| 1                | 2,3-pentanedione                      | 100.12                   | butter                     |  | 1056               |
| 2                | hexanal                               | 100.16                   | green                      |  | 1089               |
| 3                | (-)-beta-pinene <sup>d</sup>          | 136.23                   | green, eucalyptus-like     |  | 1101               |
| 4                | 3-methylbutyl acetate                 | 130.18                   | fruity                     |  | 1118               |
| 5                | p-xylene <sup>d</sup>                 | 106.16                   | green                      |  | 1130               |
| 6                | δ-carene                              | 136.23                   | green                      |  | 1140               |
| 7                | myrcene <sup>d</sup>                  | 136.23                   | earthy, geranium-like      |  | 1160               |
| 8                | R-(+)-limonene <sup>d</sup>           | 184.23                   | citrus-like                |  | 1189               |
| 9                | 3-methylbutanol                       | 88.15                    | malty, roasty              |  | 1200               |
| 10               | 2-heptanone                           | 114.19                   | fruity, flowery            |  | 1207               |
| 11               | pentan-1-ol <sup>d</sup>              | 88.15                    | fruity                     |  | 1241               |
| 12               | octanal                               | 128.21                   | citrus-like, green         |  | 1280               |
| 13               | (E)-2-heptenal                        | 112.17                   | green, flowery             |  | 1311               |
| 14               | 1-hexanol                             | 102.17                   | green, grassy              |  | 1338               |
| 15               | nonanal                               | 142.24                   | citrus-like, soapy         |  | 1376               |
| 16               | (E)-2-octenal                         | 126.2                    | fatty, grassy, green       |  | 1417               |
| 17               | acetic acid                           | 60.05                    | vinegar-like               |  | 1430               |
| 18               | (E,E)-2,4-heptadienal                 | 110.15                   | fatty, roasty              |  | 1486               |
| 19               | (Z)-2-nonenal                         | 140.22                   | green, fatty               |  | 1494               |
| 20               | benzaldehyde <sup>d</sup>             | 106.12                   | almond-like                |  | 1515               |
| 21               | (E)-2-nonenal                         | 140.22                   | fatty, cardboard-like      |  | 1524               |
| 22               | linalool                              | 154.25                   | flowery                    |  | 1539               |
| 23               | 1-octanol                             | 130.23                   | soapy, green               |  | 1545               |
| 24               | 2-methylpropanoic acid                | 88.15                    | cheesy                     |  | 1562               |
| 25               | (E,Z)-2,6-nonadienal                  | 138.21                   | cucumber-like, fatty       |  | 1574               |
| 26               | acetophenone <sup>d</sup>             | 120.15                   | marzipan-like, flowery     |  | 1611               |
| 27               | (E)-2-decenal                         | 154.25                   | green, fatty               |  | 1616               |
| 28 a/b           | 2- and 3-methylbutanoic acid          | 102.13                   | rancid, cheesy             |  | 1662               |
| 29               | alpha terpineol <sup>d</sup>          | 154.25                   | eucalyptus-like, mint-like |  | 1675               |
| 30               | (E,E)-2,4-nonadienal                  | 138.21                   | fatty, deep fried          |  | 1696               |
| 31               | 2-undecanol <sup>d</sup>              | 172.31                   | soapy                      |  | 1706               |
| 32               | (E,E)-2,4-decadienal                  | 152.23                   | fatty                      |  | 1800               |
| 33               | 2-methoxyphenol                       | 124.14                   | smoky, ham-like            |  | 1848               |
| 34               | 2-phenylethanol                       | 122.16                   | rose-like, flowery         |  | 1897               |
| 35               | 4-methylhexanoic acid                 | 130.18                   | sweaty, fishy              |  | 2011               |
| 36               | 4-hydroxy-2,5-dimethyl-3(2H)-furanone | 128.13                   | caramel-like               |  | 2026               |
| 37               | octanoic acid                         | 144.21                   | green, soapy               |  | 2043               |
| 38               | 4-methylphenol                        | 108.14                   | fecal                      |  | 2073               |
| 39               | 3-hydroxy-4,5-dimethylfuran-2(5H)-one | 128.13                   | maggi-like, celery-like    |  | 2194               |
| 40               | undecanoic acid                       | 186.29                   | soapy, coriander-like      |  | 2323               |

<sup>a</sup> Consecutive numbering of odorants according to their retention indices on capillary column DB-FFAP. <sup>b</sup> Odorant was identified by comparison of its odor quality and intensity, retention indices on capillary DB-FFAP as well as mass spectra (EI mode) with data of reference compounds. <sup>c</sup> Odor quality perceived at the odor detection port. <sup>d</sup> Odorant not determined in the cocoa pulp extracts with a factor of FD>2
